# Supplementary material
Source: PubMed Central journal article supplement (PMC5912476)
Supplement: 10.1074_M117.816298_jbc.M117.816298-1.pdf [file 10.1074_M117.816298_jbc.M117.816298-1.pdf]

## SUPPLEMENTAL DATA

### Biochemical characterization and essentiality of *Plasmodium* fumarate hydratase

Vijay Jayaraman<sup>1</sup>, Arpitha Suryavanshi<sup>1</sup>, Pavithra Kalale<sup>1</sup>, Jyothirmai Kunala<sup>1</sup>, Hemalatha Balaram<sup>1#</sup>

<sup>1</sup> Molecular Biology and Genetics Unit, Jawaharlal Nehru Centre for Advanced Scientific Research (JNCASR), Jakkur P.O., Bengaluru, Karnataka, 560064, INDIA. Tel: 91-80-22082812 Fax: 91-80-22082766. #E-mail: [hb@jncasr.ac.in](mailto:hb@jncasr.ac.in)

Table S1. Oligonucleotide sequences used for various PCRs

Table S2. Prediction of mitochondrial targeting sequence in Plasmodial FH

Figure S1. Multiple sequence alignment of *Plasmodial*, single-subunit and two-subunit bacterial and archaeal FH proteins sequences.

Figure S2. Multiple sequence alignment of FH sequences from different *Plasmodium* species.

Methods S1. Generation of  $\Delta$ *fumACB* strain of *E. coli*

Figure. S3 Genotyping of the *E. coli* strain  $\Delta$ *fumACB*.

Text S1. *In vitro* enzyme inhibition studies.

Figure S4. Generation of *P. berghei* FH knockout construct using recombineering.

Figure S5. Genotyping of *P. berghei* clones of knockout of fumarate hydratase

**Table S1. Oligonucleotide sequences used for various PCRs**

| <b>Primer Name</b>            | <b>Primer sequence (5' to 3')</b>                                                         | <b>Application</b>                                                                                |
|-------------------------------|-------------------------------------------------------------------------------------------|---------------------------------------------------------------------------------------------------|
| PfFH FL<br>_BamH1_FP          | CGCGGATCCATAAAGTTTAAAGAAGCTTCC<br>ATTTTG                                                  | Forward primer for<br>cloning PfFHFL                                                              |
| PfFH_SalI_RP                  | ACGCGTCGACTTATGATGGTAACCATTTATT<br>ATAAAAATC                                              | Common reverse<br>primer for cloning<br>PfFH                                                      |
| PfFHΔ40_Bam<br>H1_FP          | CGCGGATCCAGTTTAAATAGTTTTATAGACA<br>TTTTAAGCTTTAG                                          | Forward primer for<br>cloning PfFHΔ40                                                             |
| PfFHΔ120_Bam<br>H1_FP         | CGCGGATCCAATTATGAAAAAGAATATATA<br>CATATCCCACC                                             | Forward primer for<br>cloning PfFHΔ120                                                            |
| EcFumC_BamH<br>I-FP           | ACGCGGATCCATGAATACAGTACGCAGCGA<br>AAAAGATTTCG                                             | Forward primer for<br>cloning of EcFumC                                                           |
| EcFumC_SalI-<br>RP            | ACGCGTCGACACGCCCGGCTTTCATACTGC                                                            | Reverse primer for<br>cloning of EcFumC                                                           |
| EcFumA_BamH<br>I-FP           | GATGTAGGATCCATCAAACAAACCCTTTCAT<br>TATCAGGCTC                                             | Forward primer for<br>cloning of EcFumA                                                           |
| EcFumA_SalI-<br>RP            | GCAATAGTCGACTTATTTACACAGCGGGTG<br>CATTGTG                                                 | Reverse primer for<br>cloning of EcFumA                                                           |
| P1                            | CGGAACACCCGCCAGAGCATAACCAAACC<br>AGGCAGTAAGTGAGAGAACAGTGTAGGCTG<br>GAGCTGCTTC             | Generation and<br>validation of <i>E.coli</i><br>strain ΔfumACB (in<br><b>Figure S3 a and b</b> ) |
| P2                            | GCGCAGCCGCTTCGTTTGATCATTCCACGGC<br>TGCACCTGTATGTTGCAGACTGTCAAACATG<br>AGAATTAATTCCG       |                                                                                                   |
| P3                            | CTGAGTTAATGAGTTTTTGCATGATCAATCC<br>CTG                                                    |                                                                                                   |
| P4                            | CACAGCGGGTGCATTGTGTGAGTTG                                                                 |                                                                                                   |
| P5                            | GGCAGATAAGCTGTGGGGCGCAC                                                                   |                                                                                                   |
| P6                            | GCGTCTGGTACAAAGGAGATCAAAAACAAG<br>TCC                                                     |                                                                                                   |
| PfFHpGDB-<br><i>Xho</i> I-FP  | GACTTACTCGAGATGATAAAGTTTAAAGAA<br>GCTTCCATTTTGTATC                                        | Generation of the<br>plasmid pGDB-<br>PfFH                                                        |
| PfFHpGDB-<br><i>Avr</i> II-RP | GACTTACCTAGGTGATGGTAACCATTTATTA<br>TAAAAATCATTGCC                                         | Generation of the<br>plasmid pGDB-<br>PfFH                                                        |
| P1 and P2                     | P1:GCCATTAATAAATAGGATAACATATATA<br>AAATGCACAATCC<br>P2:CATATGATCTGGGTATCTCGCAAAGCATT<br>G | 5' integration of<br>RFA at PfFH<br>genomic locus<br>( <b>Figure 1a</b> )                         |
| P3 and P4                     | P3: GGAGACGGTCACAGCTTGTCTGTAAG<br>P4:GTTGTGATATTGCACATGAATGGATCCAA<br>TC                  | 3' integration of<br>RFA at PfFH<br>genomic locus<br>( <b>Figure 1a</b> )                         |

|           |                                                                               |                                                                                                 |
|-----------|-------------------------------------------------------------------------------|-------------------------------------------------------------------------------------------------|
| Qcup      | CATTATTCCTTTTTCTTTTTGACACATATTTA<br>AAACG                                     | Generation of<br><i>P. berghei fh</i><br>knockout construct<br><b>(Figure S4)</b>               |
| QCdown    | CCTTTTTCTTCAAACCTCAAAAATATCTAAGA<br>AATTG                                     |                                                                                                 |
| PheSR2    | TCATTCTTCGAAAACGATCTGCG                                                       |                                                                                                 |
| hdhfr     | ACTTCTTAAACCTAATCTGTAGTAAGGAAGG<br>GATTG                                      |                                                                                                 |
| RECupR2   | GATTTTGTGTGAAATTTATTTAATAAATTTG<br>TAAATTTTGAACCTAACACCGCCTACTGCG<br>ACTATAGA |                                                                                                 |
| RECdownR1 | TTAAAACCTTATGAGTTTTTTTTTCCAACAAT<br>GTACATATTTTGGAAAAAAGGCGCATAA<br>CGATACCAC |                                                                                                 |
| P1        | CGAACTATGGGCATGGTAATAATAATGGAA<br>ATAGC                                       | Primers for<br>diagnostic PCR of <i>P.</i><br><i>berghei</i> clones.<br><b>(Figure 6 and 7)</b> |
| P2        | GAAAAGCAGTAATGTTAGTACATCAAATGT<br>GTATG                                       |                                                                                                 |
| P3        | CAAGTCCAACCTATTTATGAATCATTGAAGAG<br>ACAAC                                     |                                                                                                 |
| P4        | TTCTTAAACCTAATCTGTAGTAAGGAAGGG<br>ATTG                                        |                                                                                                 |
| P5        | GTGGATGAAAATATTACTGGTGCTTTGAGG<br>GGTGAGC                                     |                                                                                                 |
| P6        | ATGGTGAGCAAGGGCGAGGAG                                                         |                                                                                                 |
| P7        | CACATATTAACAATTTGACTCTCTGCATATT<br>TTAGACTGATTC                               |                                                                                                 |
| P8        | CGAGCTCTTTATGCTTAAGTTTACAATTTAA<br>TATTC                                      |                                                                                                 |
| P9        | ATGGTAGGATATCAAAAGATTAGAAAGTTT<br>AAGAAGGTCC                                  |                                                                                                 |
| P10       | CTAAGAAGGTATCCATTTATTATAAAAGTCA<br>TTTCCTTTATTATC                             |                                                                                                 |
| Mqo_Fw    | GGATAGCTATAGTCCCTTCTTTTATTATATC<br>TCAATAATTTTTGC                             | Primers for <i>mgo</i><br>gene<br><b>(Figure 7a)</b>                                            |
| Mqo_Rv    | GTAAAGCAGTACCTGTAACACCACCACC                                                  |                                                                                                 |

**Table S2. Prediction of mitochondrial targeting sequence in Plasmodial FH**

| <b>Organism</b>             | <b>MitoProt II</b><br>(Ref. 1) | <b>TargetP</b><br>(Ref. 2) | <b>MitoFates</b><br>(Ref. 3) | <b>PlasMIT</b><br>(Ref. 4) |
|-----------------------------|--------------------------------|----------------------------|------------------------------|----------------------------|
| <i>P. falciparum</i>        | CS: NP<br>(0.88)               | CS:NP<br>(0.34)            | CS:38<br>(0.30)              | Non-mito<br>(99%)          |
| <i>P. reichenowi</i>        | CS:NP<br>(0.97)                | CS: NP<br>(0.26)           | CS:38<br>(0.29)              | Non-mito<br>(99%)          |
| <i>P. gaboni</i>            | CS:37<br>(0.92)                | CS:NP<br>(0.40)            | CS:28<br>(0.24)              | Non-mito<br>(99%)          |
| <i>P. gallinaceum</i>       | CS:NP<br>(0.85)                | CS:NP<br>(0.18)            | CS:57<br>(0.01)              | Mito<br>(91%)              |
| <i>P. knowlesi</i>          | CS: 13<br>(0.99)               | CS:11<br>(0.88)            | CS:32<br>(0.69)              | Mito<br>(91%)              |
| <i>P. fragile</i>           | CS:21<br>(0.83)                | CS:13<br>(0.83)            | CS:12<br>(0.25)              | Non-mito<br>(99%)          |
| <i>P. vinckei</i>           | CS:NP<br>(0.15)                | CS:NP<br>(0.09)            | CS:45<br>(0.005)             | Mito<br>(91%)              |
| <i>P. chabaudi</i>          | CS:NP<br>(0.89)                | CS:9<br>(0.66)             | CS:10<br>(0.17)              | Mito<br>(91%)              |
| <i>P. inui</i>              | CS:13<br>(0.97)                | CS:50<br>(0.86)            | CS:42<br>(0.32)              | Mito<br>(91%)              |
| <i>P. vivax</i>             | CS:13<br>(0.96)                | CS:29<br>(0.816)           | CS:21<br>(0.630)             | Non-mito<br>(99%)          |
| <i>P. berghei</i>           | CS:46<br>(0.85)                | CS:NP<br>(0.262)           | CS:37<br>(0.251)             | Mito<br>(91%)              |
| <i>P. yoelii</i>            | CS:NP<br>(0.435)               | CS:NP<br>(0.273)           | CS:9<br>(0.078)              | Mito<br>(91%)              |
| <b>Pf DHODH<sup>#</sup></b> | CS:24<br>(0.50)                | CS:NP<br>(0.349)           | CS:23<br>(0.996)             | Mito<br>(91%)              |

Fractional values in parentheses are probability values for either export to mitochondria (MitoProt II) or presence of mitochondrial targeting sequence (TargetP and MitoFates). Percentage values obtained from PlasMIT are an indication of the confidence for a specific localization. Boxes shaded grey in column 2 are for sequences for which MitoProt II has identified a targeting sequence and those in columns 3 and 4 are for sequences with probability values greater than 0.5 for presence of targeting sequence. In column 5, sequences predicted to have mitochondrial localization are shaded in grey. CS, cleavage site with the number adjacent corresponding to the predicted site of cleavage; mito, mitochondrially localized; non-mito, not localized to mitochondria; NP, not predicted. <sup>#</sup>As a positive control for the analysis, *P. falciparum* dihydroorotate dehydrogenase (PfdHODH), a well characterized protein with canonical mitochondrial targeting sequence was used.

P. knowlesi 1 .....MRNFTRILLCRSPGKCLSKSAHLGGNH.....PFRFKKAHKTLLHNFLDVLEFEKGGEDDTEYRRIDELSKYIEVVKIKDS  
P. fragile 1 .....MRNFARIPLCRP.....LGGKH.....PF.....RFNKAQIKTLHNFLDVLEFEKGGEDDTEYRRIDELSKYIEVVKIKDS  
P. yoelii 1 MVGYQARFKFRRIHKLFPYITCTNNLVEISGKN.....INNINNINNKLNINTLNPLDTEFEKGGNDGIEYRRIDELSKYIEVVKIPNNK  
P. berghei 1 MVGYQIRKFRKVPKLPFYITCTSNFIVGCHKHIRNISNINIRNINNKLNINTLNPLDTEFEKGGNDGIEYRRIDELSKYIEVVKIPNNK  
P. winckei 1 .....MGIHGKNO.....IS.....NINKLNKLNINTLNPLDTEFEKGGNDGIEYRRIDELSKYIEVVKILDNN  
P. chabaudi 1 MVAYQVRRFRKVPSPFSYITCTNKKPMGIHGKNH.....IS.....NINKLNKLNINTLNPLDTEFEKGGNDGIEYRRIDELSKYIEVVKILDNN  
P. gallinaceum 1 .....MLNFRNIPLLFSK.....IYGKTVNIN.....SI.....Y.KINKLNINTLNKFLDVLDFEE.....EEDIEYRKKVEDLSKYIEVVKINED  
P. falciparum 1 .....MIKFKRASILLSHKNAYLQYNLYFKKIR.....CV.....YKRIYRRHMNLSNFDILSPRN.....EEDIEYRKKVEDLSKYIEVVKINKS  
P. reichenowi 1 .....MIKFKRASILLSHKNAYIKYNLYFKKIR.....CV.....YKRIYRRHMNLSNFDILSPRN.....EEDIEYRKKVEDLSKYIEVVKINKS  
E. coli\_FumB 1 .....MSNKPFYIQ.....APFPM.....GKDNTYLL.....TSDYVSVADPF  
G. metallireduens 1 .....MSTKPFVYQ.....EPFPL.....EKDTSYKIPDSEKYSVATFE  
B. petrii .....  
V. cholerae .....  
N. meningitidis .....  
A. vinelandii .....  
Acinetobacter .....  
Metallospheara .....  
Fervidococcus .....  
Pyrolobus .....  
Thermoproteus .....  
Acidilobus .....  
Caldisphaera .....

P. knowlesi 78 PIN.ESKYYGYNFENEDNFFHPNGELKKNL..PEQVRQNEVERIKEIYHPPFVTKCEYAFRE.LLFFNKKHKCOLSNIKGGRSKNDHYVAMT  
P. fragile 67 PIN.ESKYYGYNFENEDNFFHPNGELKKNL..PEQVIQNEGERIKEIYHPPFVTKCEYAFKE.LLFFNKKHKCOLSNIKGGRSKNDHYVAMT  
P. yoelii 90 IND.DNKYYDINYEDENEFFDDNGNLKIK..NNEYKESKNVIKEIYHPPFVTKCEYALKE.LLFFNKNHKCOLQNIIMKKSNDHYVAMT  
P. berghei 99 INE.NSKYYDINYEDENEFFDDNGNLKIK..NNEYKESKNVIKEIYHPPFVTKCEYALKE.LLFFNKNHKCOLQNIIMKKSNDHYVAMT  
P. winckei 61 KINKDSKYYDINYEDENEFFDDNGNLKIK..NDCEKSNKNVMKEYLHPPFVTKCEYALKE.LLFFNKKHKCOLQNIIMKKSNDHYVAMT  
P. chabaudi 87 KINKDSKYYDINYEDENEFFDDNGNLKIK..NDCEKSNKNVMKEYLHPPFVTKCEYALKE.LLFFNKKHKCOLQNIIMKKSNDHYVAMT  
P. gallinaceum 73 IPN.KTKYGYDFTDNTNFFDKNGNKIY...SKQDINKDAKEYIYHPPFVTKCEYAFKE.LLFFNKKHKCOLQNIIMKKSNDHYVAMT  
P. falciparum 78 PMN.ETKYYGYNFKEEYFLDEHGNIKEYIYENKLLKHYKEYIYHPPFVTKCEYAFKE.LLFFNKKHKCOLQNIIMKKSNDHYVAMT  
P. reichenowi 79 PMN.ETKYYGYNFKEEYFLDEHGNIKEYIYENKLLKHYKEYIYHPPFVTKCEYAFKE.LLFFNKKHKCOLQNIIMKKSNDHYVAMT  
E. coli\_FumB 36 .....GETILKVEPALTLIAQAQPHD.ASFMLRPAHQKQVAAIHPHPSASNDHYVALQ  
G. metallireduens 38 .....GKEVLKVDPEALTVLIANTAMRD.VSFLRPEHNEVAKIRRPASASNDHYVALQ  
B. petrii 1 .....MRFLAEAAHVDSIANAQLP.VSHHPPDPVQALKR.AYQARTQAPAAANALLO  
V. cholerae 1 .....MTVIRKQDVISSVADALQY..SYYPPLDPVKALEK.AYRRESQAAADSIAQ  
N. meningitidis 1 .....MTVIRKQDVISSVADALQY..SYYPPLDPVKALEK.AYRRESQAAADSIAQ  
A. vinelandii 1 .....MTVIRKQDVISSVADALQY..SYYPPLDPVKALEK.AYRRESQAAADSIAQ  
Acinetobacter 1 .....MTVIRKQDVISSVADALQY..SYYPPLDPVKALEK.AYRRESQAAADSIAQ  
Metallospheara 1 .....MTSDFYSVEHVSETLYKALTVIPKDVVERIGK.AYRRESQAAADSIAQ  
Fervidococcus 1 .....MELNRSFNKLVKLSGPIV.VAIKLSDDVNEKLINE.HIRKESQDVGNLRYEAD  
Pyrolobus 1 .....MORKLVDVAVEAIRI.AETRLPDVVEARS..AARREGAAKAALQEA  
Thermoproteus 1 .....MNLVEVMRAAKEAIR.ASISPAFDVVSALRR.AARVESSEAAAVOIGA  
Acidilobus 1 .....MGIHQDVGAFYEMIRT.AATSIPEDVYRALKE.GYRRTMPLAKOLEA  
Caldisphaera 1 .....MGIHQDVGAFYEMIRT.AATSIPEDVYRALKE.GYRRTMPLAKOLEA

P. knowlesi 171 LTKNVAIAARARPPCQDTGTAIILQKDE.EI.....LTYEHKYLIGVYNAI.RNNNFRYSOLSPLSFSEENKMLPCQIYSSVRAK  
P. fragile 161 LTKNVAIAARARPPCQDTGTAIILQKDE.EI.....LTYEHKYLIGVYNAI.RNNNFRYSOLSPLSFSEENKMLPCQIYSSVRAK  
P. yoelii 183 LTKNVAIAARARPPCQDTGTAIILQKDE.EI.....LTYEHKYLIGVYNAI.RNNNFRYSOLSPLSFSEENKMLPCQIYSSVRAK  
P. berghei 192 LTKNVAIAARARPPCQDTGTAIILQKDE.EI.....LTYEHKYLIGVYNAI.RNNNFRYSOLSPLSFSEENKMLPCQIYSSVRAK  
P. winckei 155 LTKNVAIAARARPPCQDTGTAIILQKDE.EI.....LTYEHKYLIGVYNAI.RNNNFRYSOLSPLSFSEENKMLPCQIYSSVRAK  
P. chabaudi 161 LTKNVAIAARARPPCQDTGTAIILQKDE.EI.....LTYEHKYLIGVYNAI.RNNNFRYSOLSPLSFSEENKMLPCQIYSSVRAK  
P. gallinaceum 184 LTKNVAIAARARPPCQDTGTAIILQKDE.EI.....LTYEHKYLIGVYNAI.RNNNFRYSOLSPLSFSEENKMLPCQIYSSVRAK  
P. falciparum 173 LTKNVAIAARARPPCQDTGTAIILQKDE.EI.....LTYEHKYLIGVYNAI.RNNNFRYSOLSPLSFSEENKMLPCQIYSSVRAK  
P. reichenowi 174 LTKNVAIAARARPPCQDTGTAIILQKDE.EI.....LTYEHKYLIGVYNAI.RNNNFRYSOLSPLSFSEENKMLPCQIYSSVRAK  
E. coli\_FumB 90 FLRNRSAARARPPCQDTGTAIIVQKQO.VV.....TGGDREALSQVYNTY.IEDNLRYSOAAALD.YKVVNCGIPLPAQIDY.....  
G. metallireduens 92 FLRNRSAARARPPCQDTGTAIIVQKQO.VV.....TGGDREALSQVYNTY.IEDNLRYSOAAALD.YKVVNCGIPLPAQIDY.....  
B. petrii 51 LLVNRSAARARPPCQDTGTAIIVQKQO.VV.....TGGDREALSQVYNTY.IEDNLRYSOAAALD.YKVVNCGIPLPAQIDY.....  
V. cholerae 51 LLVNRSAARARPPCQDTGTAIIVQKQO.VV.....TGGDREALSQVYNTY.IEDNLRYSOAAALD.YKVVNCGIPLPAQIDY.....  
N. meningitidis 52 LLVNRSAARARPPCQDTGTAIIVQKQO.VV.....TGGDREALSQVYNTY.IEDNLRYSOAAALD.YKVVNCGIPLPAQIDY.....  
A. vinelandii 51 LLVNRSAARARPPCQDTGTAIIVQKQO.VV.....TGGDREALSQVYNTY.IEDNLRYSOAAALD.YKVVNCGIPLPAQIDY.....  
Acinetobacter 52 LLVNRSAARARPPCQDTGTAIIVQKQO.VV.....TGGDREALSQVYNTY.IEDNLRYSOAAALD.YKVVNCGIPLPAQIDY.....  
Metallospheara 52 LLVNRSAARARPPCQDTGTAIIVQKQO.VV.....TGGDREALSQVYNTY.IEDNLRYSOAAALD.YKVVNCGIPLPAQIDY.....  
Fervidococcus 52 VKNRISALERKAPCQDTGTAIIVQKQO.VV.....TGGDREALSQVYNTY.IEDNLRYSOAAALD.YKVVNCGIPLPAQIDY.....  
Pyrolobus 47 LLVNRSAARARPPCQDTGTAIIVQKQO.VV.....TGGDREALSQVYNTY.IEDNLRYSOAAALD.YKVVNCGIPLPAQIDY.....  
Thermoproteus 49 LLVNRSAARARPPCQDTGTAIIVQKQO.VV.....TGGDREALSQVYNTY.IEDNLRYSOAAALD.YKVVNCGIPLPAQIDY.....  
Acidilobus 50 LLVNRSAARARPPCQDTGTAIIVQKQO.VV.....TGGDREALSQVYNTY.IEDNLRYSOAAALD.YKVVNCGIPLPAQIDY.....  
Caldisphaera 50 LLVNRSAARARPPCQDTGTAIIVQKQO.VV.....TGGDREALSQVYNTY.IEDNLRYSOAAALD.YKVVNCGIPLPAQIDY.....

P. knowlesi 259 AHGVC.....TPPGVLSASSTAP.....TSSPKYELIFIAAGGANKTFLPQOTKSLNE...GKLYDFLLRKT  
P. fragile 249 AHGVC.....TPPGVLSASSTAP.....TSSPKYELIFIAAGGANKTFLPQOTKSLNE...GKLYDFLLRKT  
P. yoelii 271 NLNDK.....TPPGVLRASPPSSPTCAAS...TASIAKYEELIFIAAGGANKTFLPQOTKSLNE...GKLYDFLLRKT  
P. berghei 280 NLNDK.....TPPGVLRASPPSSPTCAAS...TASIAKYEELIFIAAGGANKTFLPQOTKSLNE...GKLYDFLLRKT  
P. winckei 243 NLNDK.....TPPGVLRASPPSSPTCAAS...TASIAKYEELIFIAAGGANKTFLPQOTKSLNE...GKLYDFLLRKT  
P. chabaudi 269 HLNYP.....TPPGVLRASPPSSPTCAAS...TASIAKYEELIFIAAGGANKTFLPQOTKSLNE...GKLYDFLLRKT  
P. gallinaceum 252 KENSNS.....TPPGVLRASPPSSPTCAAS...TASIAKYEELIFIAAGGANKTFLPQOTKSLNE...GKLYDFLLRKT  
P. falciparum 261 LHEVQONEYPNHMKDIQNNNVKHNKDIITRQIDSKENQKSTKQNVDFYDGPKYELIFIAAGGANKTFLPQOTKSLNE...GKLYDFLLRKT  
P. reichenowi 262 LHEVQONEYPNHMKDIQNNNVKHNKDIITRQIDSKENQKSTKQNVDFYDGPKYELIFIAAGGANKTFLPQOTKSLNE...GKLYDFLLRKT  
E. coli\_FumB 172 .....AVDGDYKFLCVAKGAGANKTYLQETKALLTP...GKLYDFLLRKT  
G. metallireduens 174 .....AVDGDYKFLCVAKGAGANKTYLQETKALLTP...GKLYDFLLRKT  
B. petrii 141 .....VEGDRLDITVAAGGAGANKTYLQETKALLTP...GKLYDFLLRKT  
V. cholerae 137 .....VEGDRLDITVAAGGAGANKTYLQETKALLTP...GKLYDFLLRKT  
N. meningitidis 137 .....VEGDRLDITVAAGGAGANKTYLQETKALLTP...GKLYDFLLRKT  
A. vinelandii 137 .....VEGDRLDITVAAGGAGANKTYLQETKALLTP...GKLYDFLLRKT  
Acinetobacter 137 .....VEGDRLDITVAAGGAGANKTYLQETKALLTP...GKLYDFLLRKT  
Metallospheara 138 .....KDKIRITRALPKGAGANKTYLQETKALLTP...GKLYDFLLRKT  
Fervidococcus 135 .....KDKIRITRALPKGAGANKTYLQETKALLTP...GKLYDFLLRKT  
Pyrolobus 130 .....KDKIRITRALPKGAGANKTYLQETKALLTP...GKLYDFLLRKT  
Thermoproteus 131 .....KDKIRITRALPKGAGANKTYLQETKALLTP...GKLYDFLLRKT  
Acidilobus 132 .....KDKIRITRALPKGAGANKTYLQETKALLTP...GKLYDFLLRKT  
Caldisphaera 132 .....KDKIRITRALPKGAGANKTYLQETKALLTP...GKLYDFLLRKT



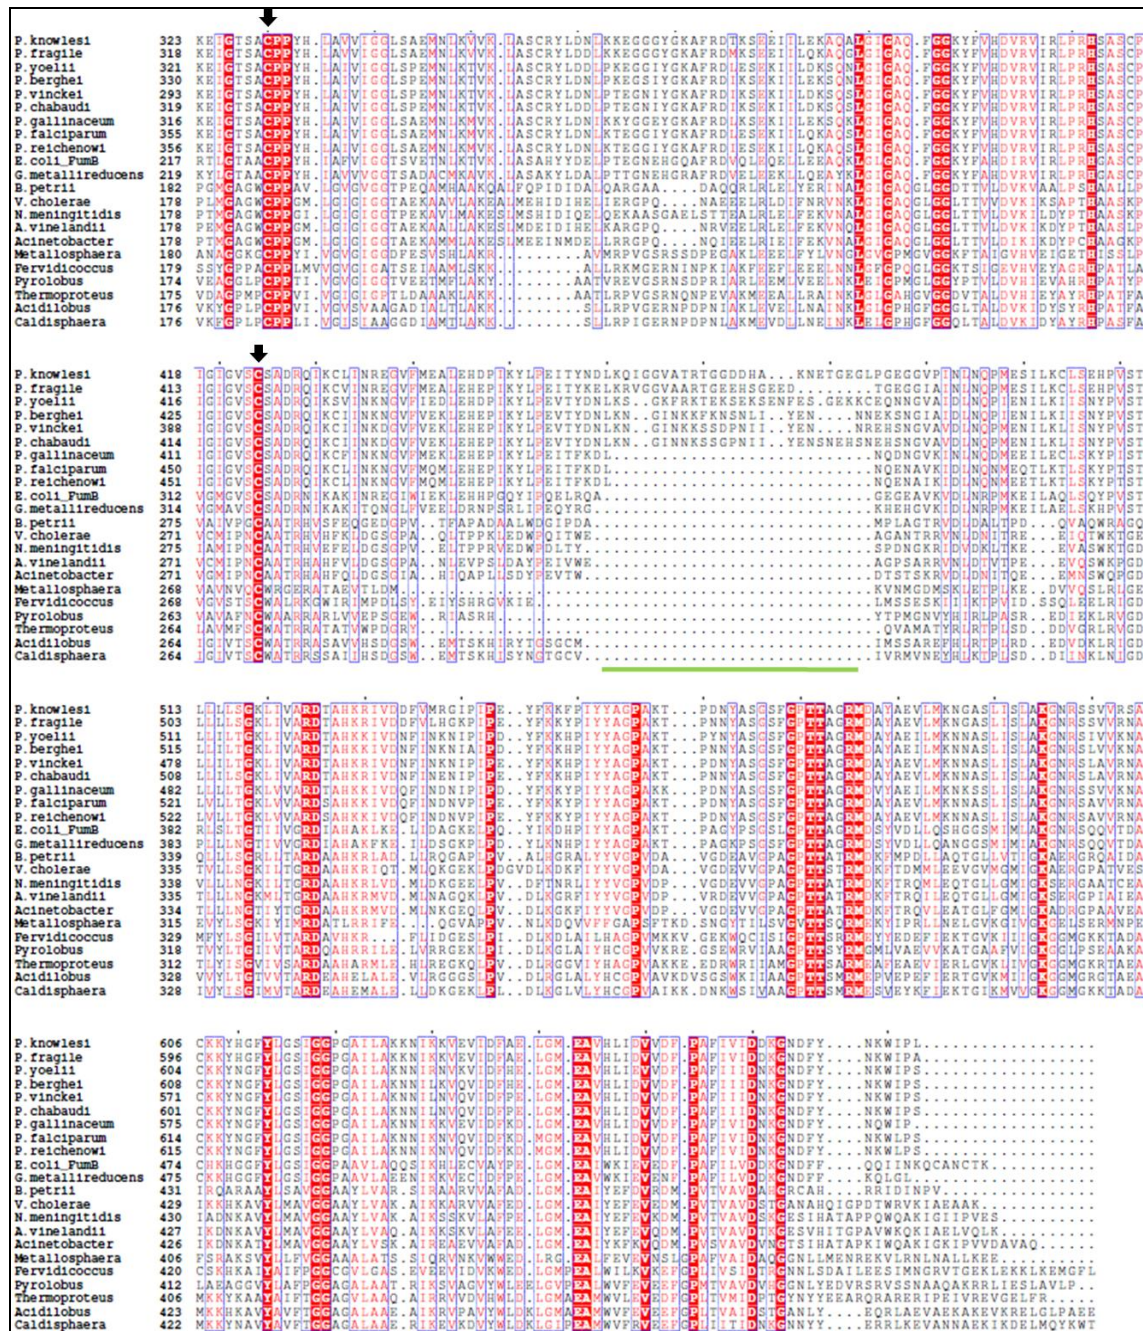

**Figure S1. Multiple sequence alignment of *Plasmodial*, single-subunit and two-subunit bacterial and archaeal FH proteins sequences.** The black solid line shows 120 amino acid insertion at the N-terminus in *Plasmodium* FH sequences. The black arrow shows invariant cysteine residues that are involved in Fe-S cluster ligation. The green bar indicates the boundary between the N- and C-terminal domains.



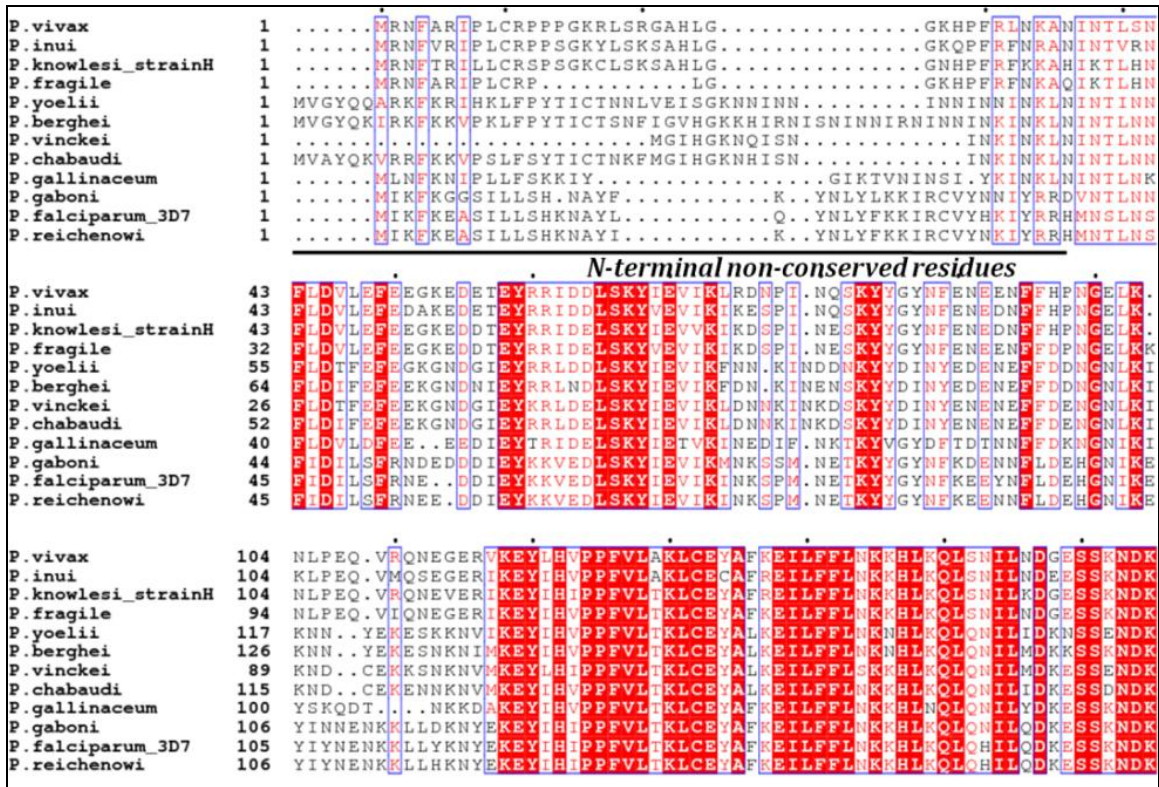

**Figure S2. Multiple sequence alignment of FH sequences from different *Plasmodium* species.** The initial 40 residues (Pf numbering) highlighted by a solid black line are not conserved. Many residues in the stretch of 41-120 residues, though not present in bacterial and two-subunit type FH sequences are highly conserved in all *Plasmodium* FH.

### **Methods S1. Generation of $\Delta$ *fumACB* strain of *E. coli***

To knockout *fumA* and *fumC* genes in the *E. coli* strain JW4083-1, established protocols were followed (5). Briefly, to remove the kanamycin cassette at the *fumB* locus, JW 4083-1 cells were transformed with the plasmid pCP20 that carries the gene for the enzyme flippase. Thereafter, the cells were cured of the plasmid by incubation at 42 °C for 12 h. Subsequently, the cells were transformed with the plasmid pSC101 to introduce the high-efficiency  $\lambda$ -phage recombination machinery. In order to knockout the genes *fumA* and *fumC*, oligonucleotide primers P1 and P2 (Table S1) were used to amplify a kanamycin cassette using plasmid pKD13 (5) as template, such that the PCR product carries the homologous regions corresponding to the 5' flank of *fumA* and 3' flank of *fumC* (Figure S3 a). The PCR product was DpnI treated and thereafter used for transformation. Transformation was performed by electroporation and cells were selected on LB medium containing kanamycin. Kanamycin resistant colonies were screened by PCR using oligonucleotides P3 and P6 to validate the insertion of the antibiotic cassette in the right locus as given in Figure S3 b and c. The cells were also checked for the absence of the wild-type genes, *fumA*, and *fumC* using oligonucleotide primers P3/P4 and P5/P6, respectively (Figure S3 d) The kanamycin cassette at the *fumA/C* gene locus was removed by expressing flippase in the strain resulting in the generation of marker free fumarate hydratase null strain.



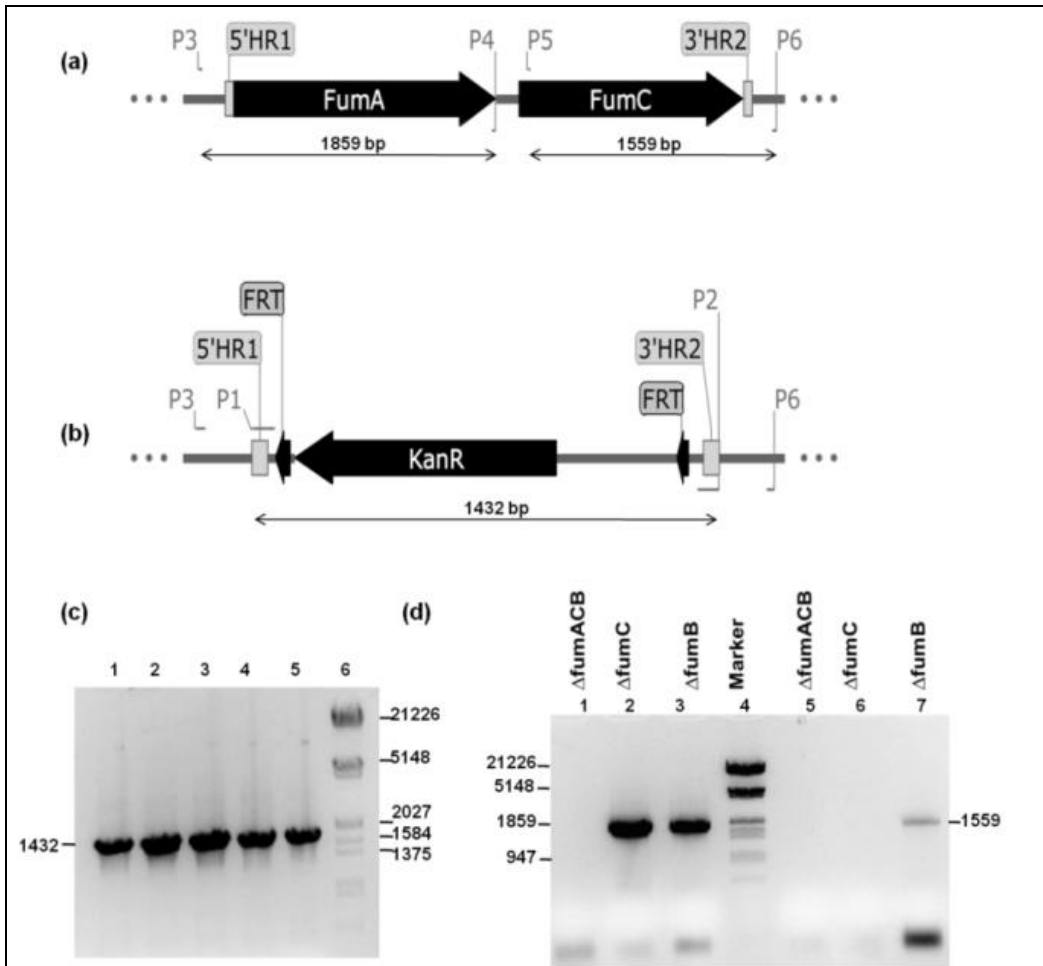

**Figure S3. Genotyping of the *E. coli* strain  $\Delta$ *fumACB*.** (a) The relative orientation of *fumA* and *fumC* genes in the  $\Delta$ *fumB* *E. coli* strain JW4083-1 and location of primers (P3-P6) used for validation of the knockout. 5'HR1 and 3'HR2 represent the 30 bp homologous regions used for gene replacement with kanamycin resistant marker. (b) *fumA/C* gene locus after homologous recombination and replacement with kanamycin resistance marker flanked by FRT sites. The orientation of the primers (P1 and P2) used for amplification by PCR of the kanamycin cassette is shown. (c) PCR amplified products using primers P1 and P2 and genomic DNA of 5 different colonies selected on kanamycin plate as template, showing the presence the kanamycin selection cassette integrated into the right locus. (d) Lanes 1-3 amplicons obtained on performing a PCR to check the presence/absence of *fumA* gene using primers P3 and P4 and genomic DNA from different *E. coli* strains (as mentioned in the figure) as template. Lanes 5-7, amplicons obtained on performing a PCR to check the presence/absence of *fumC* gene using primers P5 and P6 and genomic DNA from different FH knockout strains (as mentioned in the figure) as template. The size of DNA fragments is indicated in bp.

**Text S1. *In vitro* enzyme inhibition studies**

The small molecules examined for their effect on FH activity with fumarate as substrate were DL-mercaptosuccinic acid, meso-tartaric acid, succinic acid, aspartic acid, hadacidin (N-formyl-N-hydroxyglycine), alanosine, pyromellitic acid, itaconic acid, malonic acid, citric acid, trans-aconitic acid, D-malic acid, gamma-aminobutyric acid, alpha-ketoglutaric acid, oxaloacetic acid, DL-2 amino- 3 phenyl propionic acid, L-tartaric acid, sulfosuccinic acid, and ureidosuccinic acid. All molecules were tested at a concentration of 500  $\mu$ M.

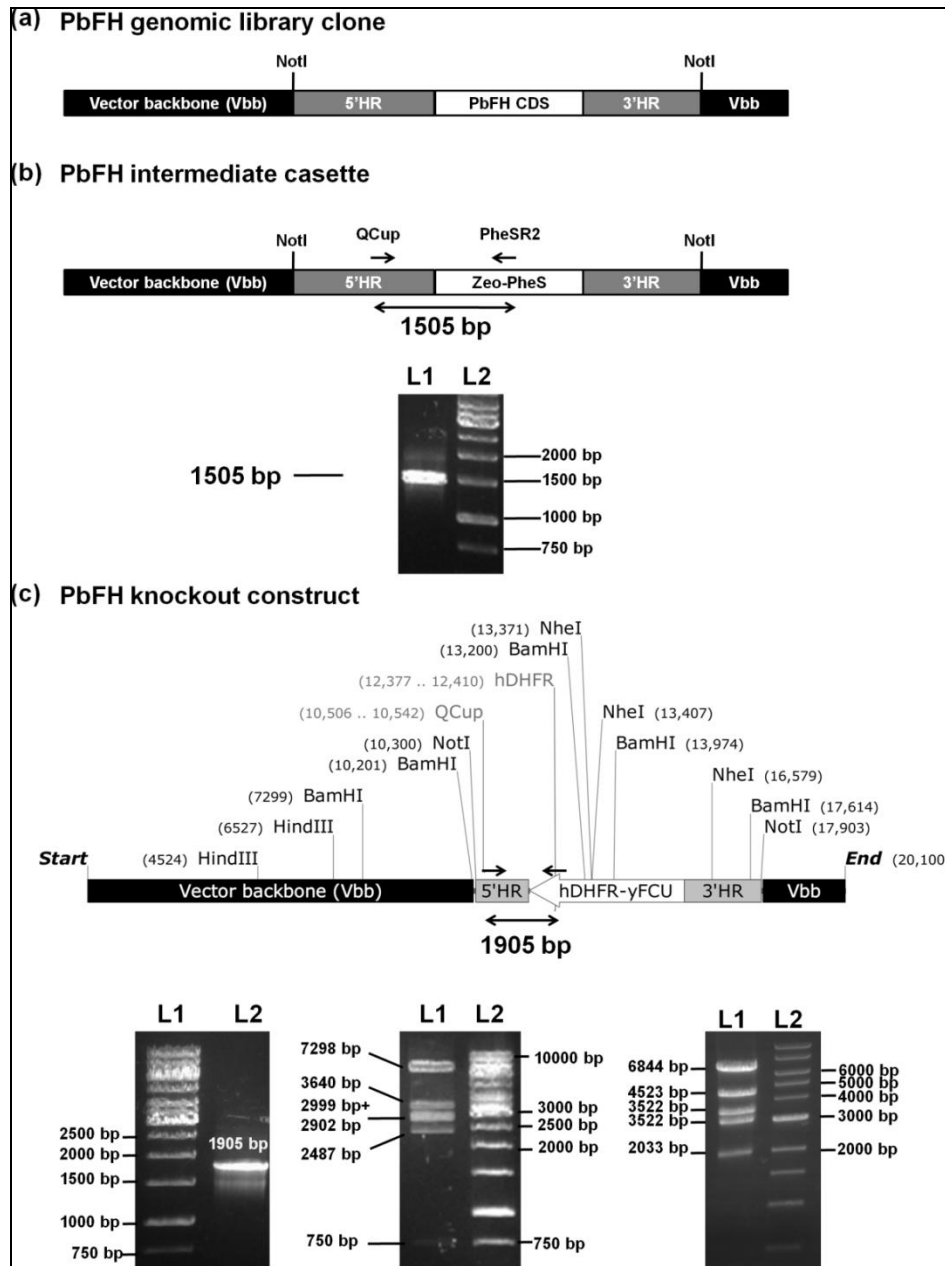

**Figure S4. Generation of *P. berghei* FH knockout construct using recombineering.** (a) Schematic representation of the PbFH genomic clone (PbG01-2466a09) obtained from PlasmogEM. (b) Schematic representation of the intermediate vector in which the gene of interest is replaced by the bacterial selection marker, *ble* (resistant to zeocin). The position of validation primers QCup and PheSR2 are indicated. The agarose gel shows the band of expected size (1505 bp) obtained by PCR using QCup and PheSR2 oligonucleotide primers and the intermediate vector DNA isolated from a bacterial colony (L1) from the zeocin plate, L2, molecular weight marker. (c) Schematic representation of the final knockout construct in which the Zeo-Phe cassette is replaced by *Plasmodium* positive/negative selection cassette, hDHFR-yFCU. The position of validation oligonucleotide primers QCup and *hdhfr* are represented by black arrows. The agarose gel on the left shows the band of expected size (1905 bp) obtained by PCR using primers QCup and *hdhfr* and plasmid isolated from a bacterial colony (L2) (obtained upon negative selection in an LB-agar plate containing p-chlorophenylalanine) as template. L1, molecular weight

marker. The agarose gels in the middle and right panels show the restriction mapping of the PbFHKO construct by BamHI and, NheI and HindIII digestion, respectively. All the bands of expected size are present. For transfection in *P. berghei*, this verified knockout construct was used.



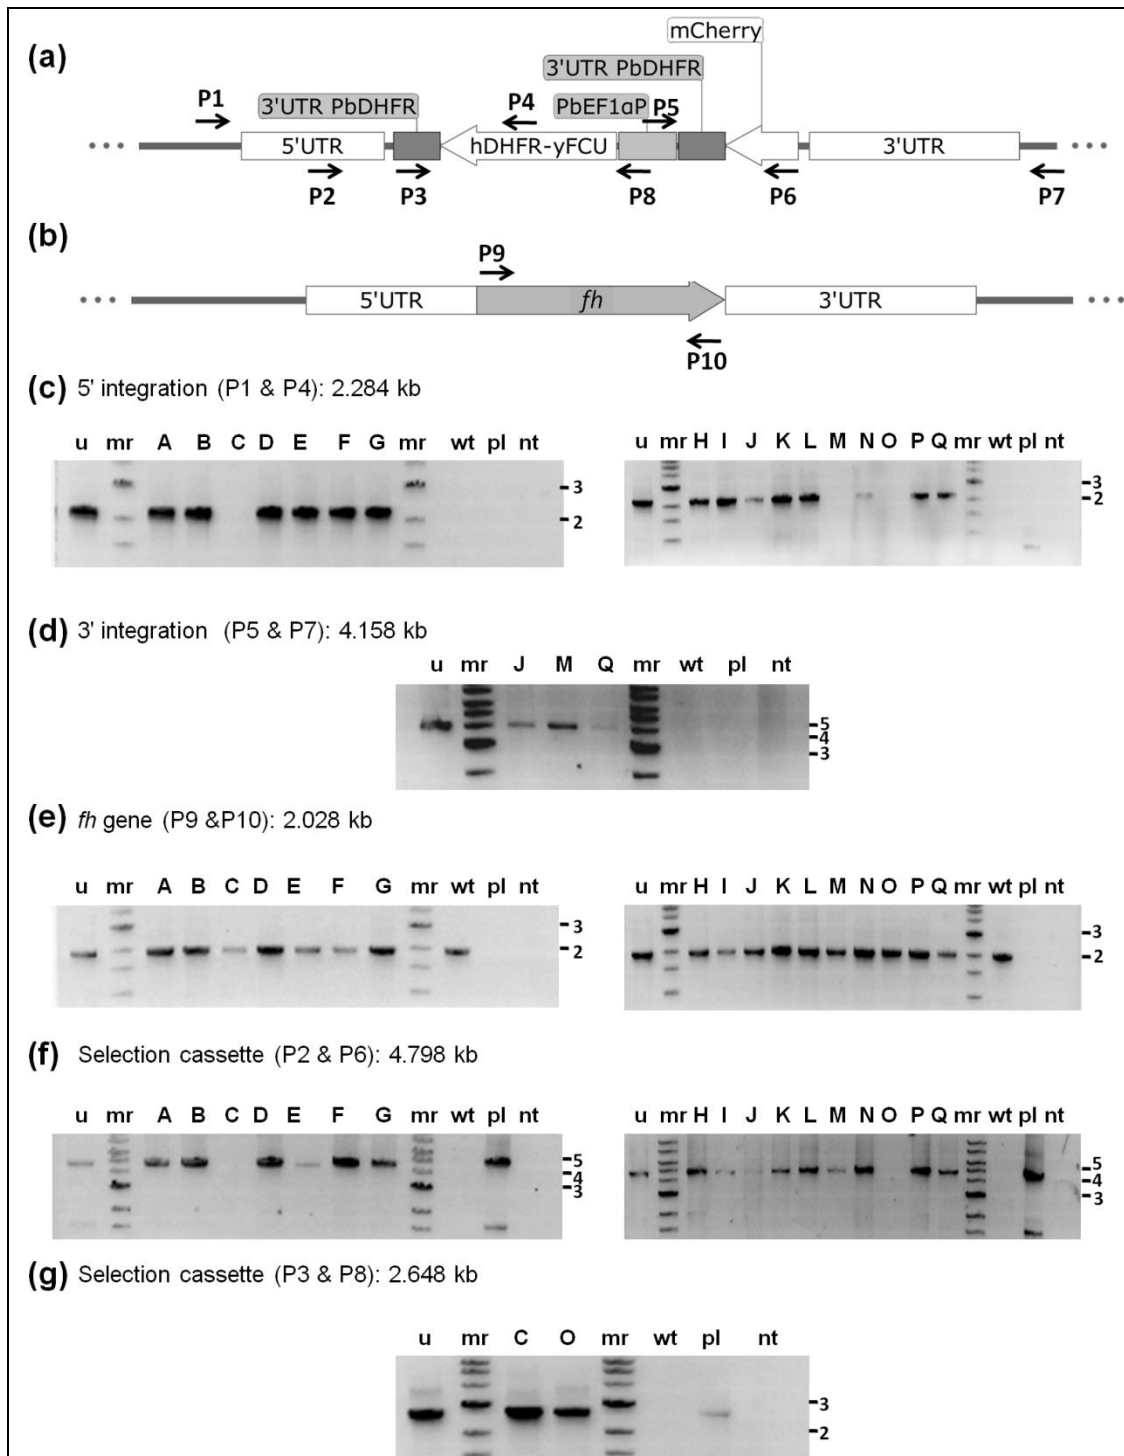

**Figure S5. Genotyping of *P. berghei* clones of knockout of fumarate hydratase.** (a) Schematic representation of the selectable marker cassette inserted into the *fh* gene locus of *P. berghei* genome. Primers (P1-P8) used for diagnostic PCRs are indicated. (b) Schematic representation of the *fh* gene (PBANKA\_0828100) flanked by 5' UTR and 3' UTR showing the location of primers P9 and P10. Agarose gel electrophoresis of PCRs with genomic DNA from (c) clones A-G (left panel) and clones H-Q (right panel) for detection of 5' integration; (d) clones J, M and Q for detection of 3' integration (other clones did not answer for this PCR); (e) clones A-G (left panel) and clones H-Q (right panel) for the

detection of *fh* gene; (f) clones A-G (left panel) and H-Q (right panel) for the presence of selectable marker cassette; (g) clones C and O using primers P3 and P8. Clones C, M and O did not answer for 5' integration while only clones J, M and Q answered for 3' integration. All clones answered for the presence of the *fh* gene (Panel d). All clones except C and O answered by PCR with primers P2 and P6 (left and right panels of f) indicating the integration of the entire selectable marker cassette into the genome. Clones C and O answered for a shorter fragment of the selectable marker cassette covered by primers P3 and P8 (panel g). hDHFR-yFCU, human DHFR-yeast cytosine and uridyl phosphoribosyltransferase, u, uncloned population, mr, molecular weight marker; wt, wild-type *P. berghei* genomic DNA; pl, pJAZZ-FH knockout construct (supplementary figure S4); nt, control PCR without template. Numbers to the right of panels d, e, f, g and h are the sizes of the marker DNA fragments in kbp.

## REFERENCES

1. Claros, M. G., and Vincens, P. (1996) Computational method to predict mitochondrially imported proteins and their targeting sequences. *Eur. J. Biochem.* **241**, 779–86
2. Emanuelsson, O., Nielsen, H., Brunak, S., and von Heijne, G. (2000) Predicting subcellular localization of proteins based on their N-terminal amino acid sequence. *J. Mol. Biol.* **300**, 1005–16
3. Fukasawa, Y., Tsuji, J., Fu, S.-C., Tomii, K., Horton, P., and Imai, K. (2015) MitoFates: Improved Prediction of Mitochondrial Targeting Sequences and Their Cleavage Sites. *Mol. Cell. Proteomics.* **14**, 1113–1126
4. Bender, A., van Dooren, G. G., Ralph, S. A., McFadden, G. I., and Schneider, G. (2003) Properties and prediction of mitochondrial transit peptides from *Plasmodium falciparum*. *Mol. Biochem. Parasitol.* **132**, 59–66
5. Baba, T., Ara, T., Hasegawa, M., Takai, Y., Okumura, Y., Baba, M., Datsenko, K. A., Tomita, M., Wanner, B. L., and Mori, H. (2006) Construction of *Escherichia coli* K-12 in-frame, single-gene knockout mutants: the Keio collection. *Mol. Syst. Biol.* **2**, 2006.0008
